# Supplementary material for: Global Network Analysis of Neisseria gonorrhoeae Identifies Coordination between Pathways, Processes, and Regulators Expressed during Human Infection
Source: PubMed Central journal article supplement (PMC7002116; doi:10.1128/msystems.00729-19), 2020-02-04

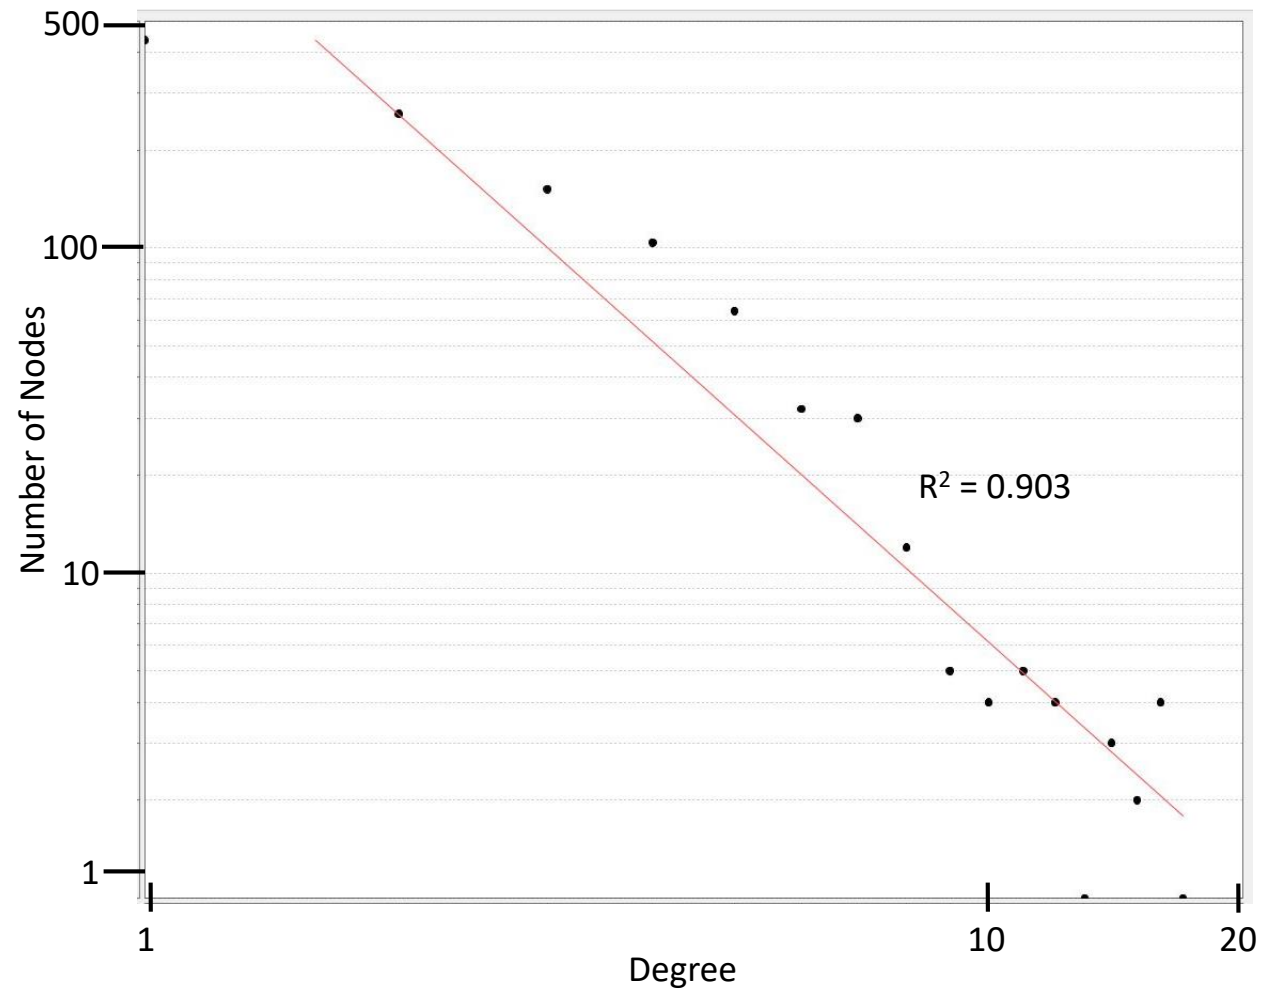

Supplement: mSystems.00729-19-sf001.pdf [file mSystems.00729-19-sf001.pdf]
