# Supplementary material for: Global Network Analysis of Neisseria gonorrhoeae Identifies Coordination between Pathways, Processes, and Regulators Expressed during Human Infection
Source: PubMed Central journal article supplement (PMC7002116; doi:10.1128/msystems.00729-19), 2020-02-04
Supplement: mSystems.00729-19-sf004.pdf [file mSystems.00729-19-sf004.pdf]

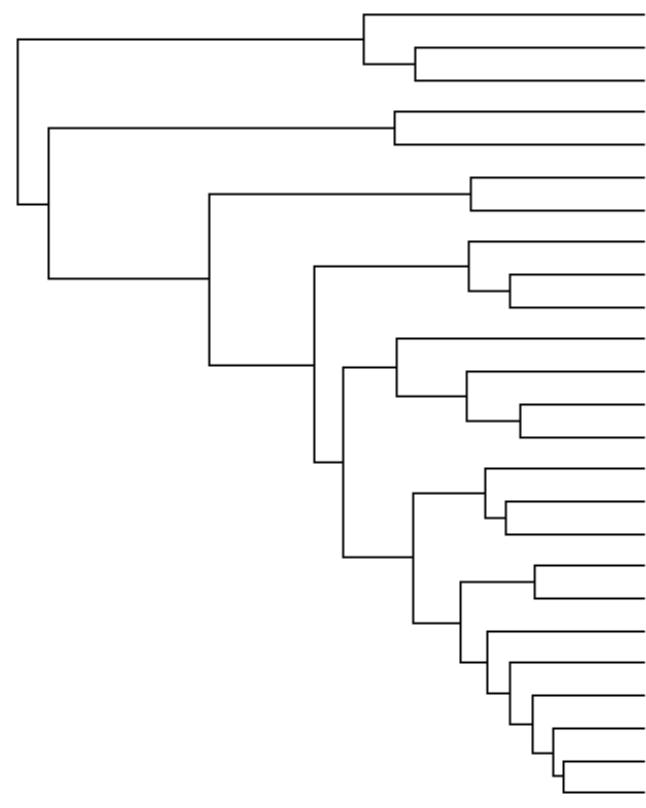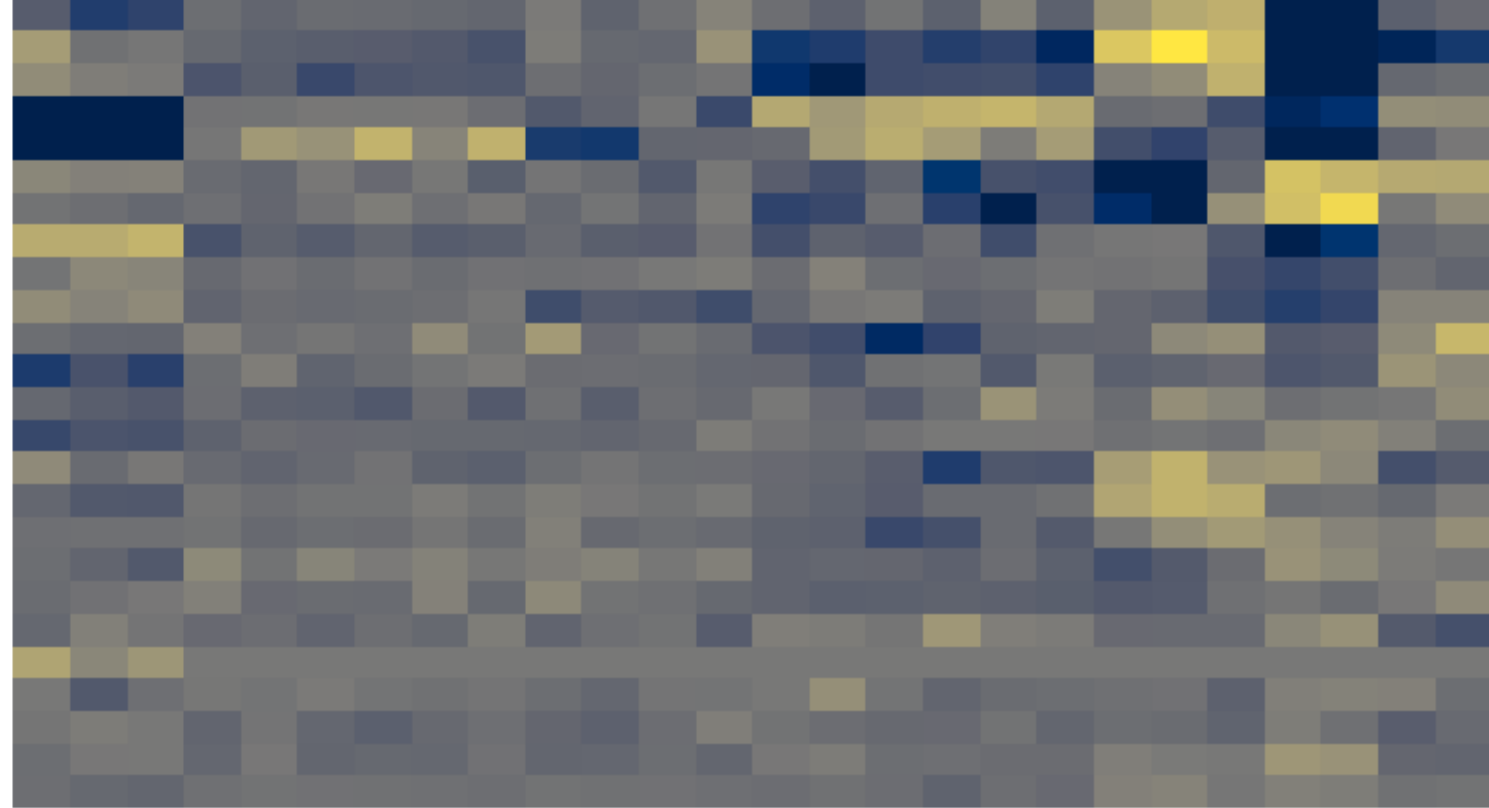

PMN\_10min  
PMN\_180min  
PMN\_360min  
WT\_1h\_Plus  
WT\_1h\_Minus  
FurKO\_Plus\_1h  
FurKO\_Minus\_1h  
FurC\_Plus\_1h  
FurC\_Minus\_1h  
Male\_CDM  
Female\_CDM  
Female\_Lavage  
Male\_Swab  
WT\_Plus\_3h  
WT\_Minus\_3h  
FurKO\_Plus\_3h  
FurKO\_Minus\_3h  
FurC\_Plus\_3h  
FurC\_Minus\_3h  
CpX\_WT  
CpX\_CpxA\_KO  
CpX\_CpxR\_KO  
H2O2\_Control  
H2O2\_Treatment  
MisR\_WT  
MisR\_misRSKO

16  
9  
5  
23  
14  
34  
20  
4  
8  
3  
19  
24  
25  
15  
12  
13  
7  
21  
1  
18  
17  
22  
10  
2  
6
